# Supplementary material for: Validation of a quantitative trait locus for the white-core expression rate of grain on chromosome 6 in a brewing rice cultivar and development of DNA markers for marker-assisted selection
Source: PubMed Central journal article supplement — Breed Sci. 2019 Jul 6;69(3):401–9. doi: 10.1270/jsbbs.18166 (PMC6776145; doi:10.1270/jsbbs.18166), 2019-07-06
Supplement: 69_18166_1.pdf [file 69_18166_1.pdf]

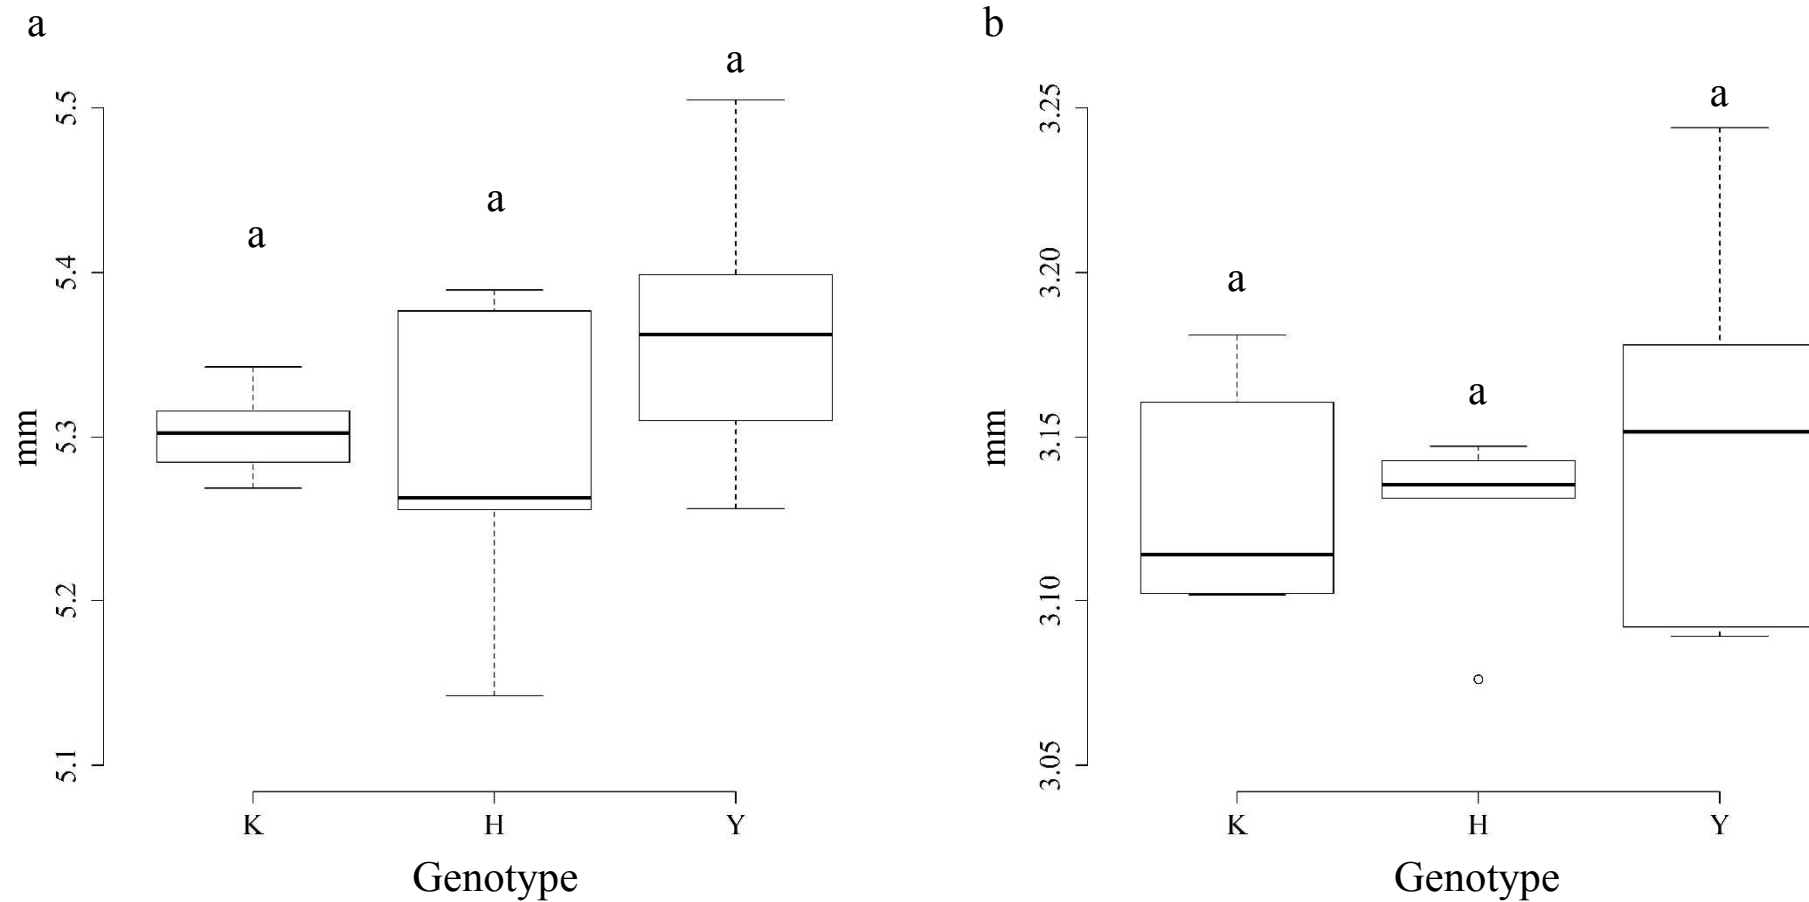

Supplemental Fig. 1. Grain length (a) and width (b) of Second RHLs

On the horizontal axis, K, H, and Y represent the *qWCE6* genotype for Koshihikari homozygous, Koshihikari heterozygous, and Yamadanishiki homozygous, respectively. The letters above each boxplot indicate the statistical differences between groups using five plants selected at random per each genotype (Tukey-Kramer method,  $P < 0.05$ ).

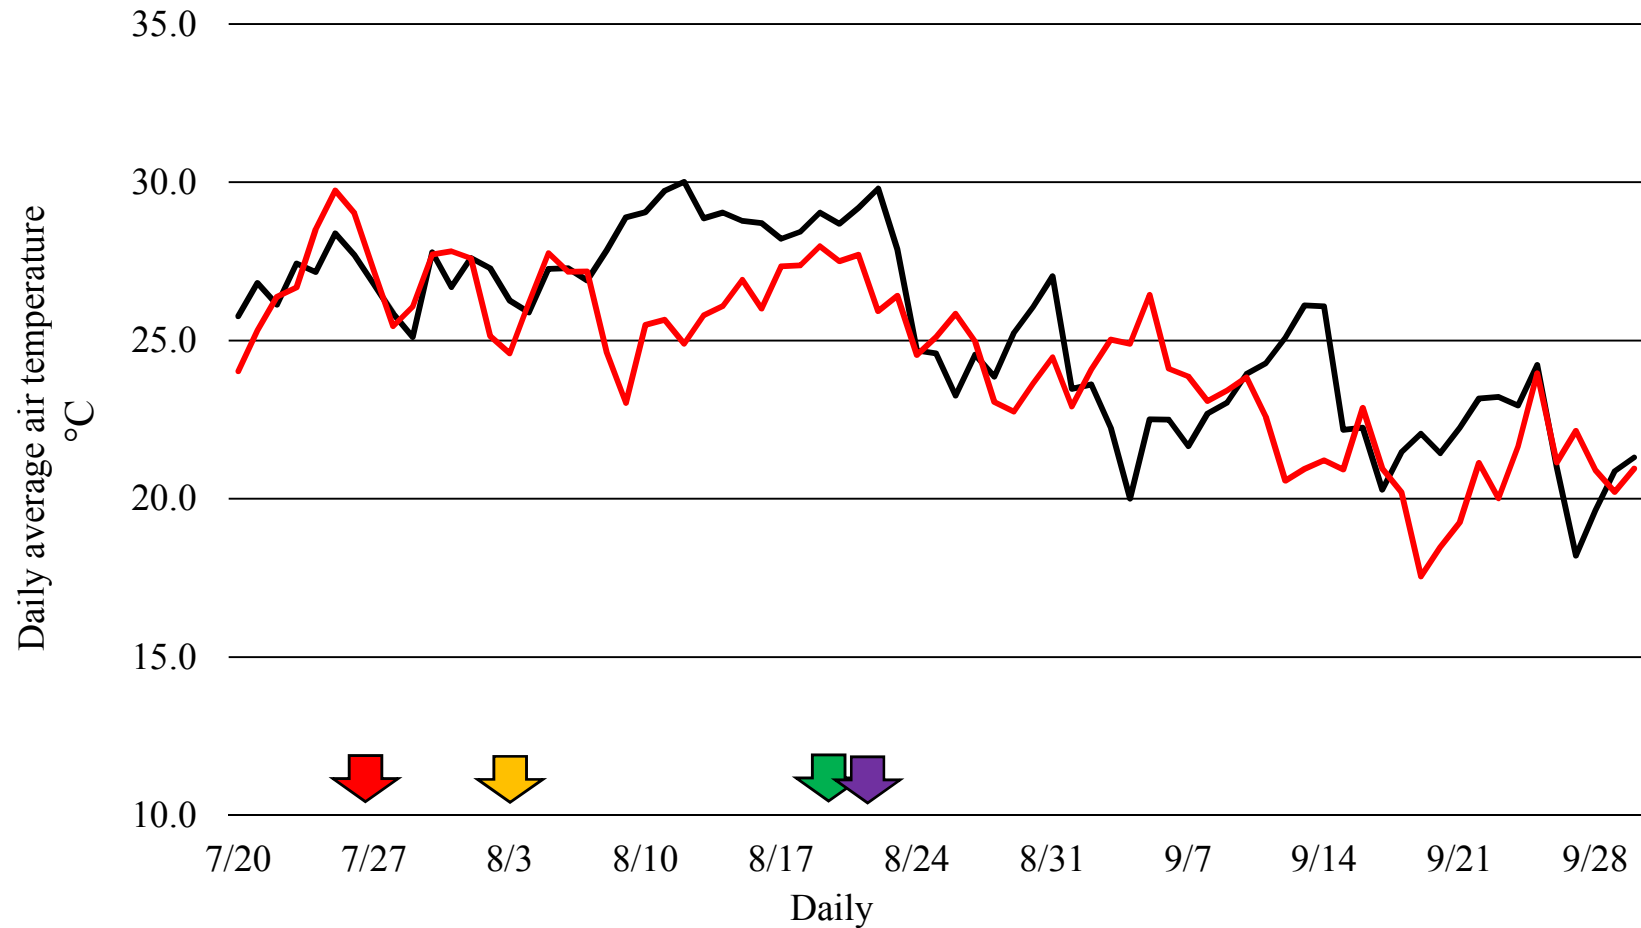

Supplemental Fig. 2. Daily average air temperature in 2013 (black line) and 2014 (red line)  
 The red, yellow, green, and purple arrows indicate the averaged heading dates for Koshihikari, VL\_E,  
 Yamadanishiki, and VL\_L, respectively.

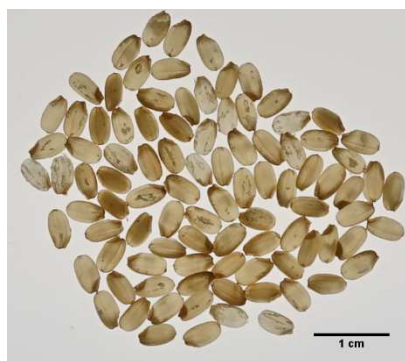

2013 Koshihikari

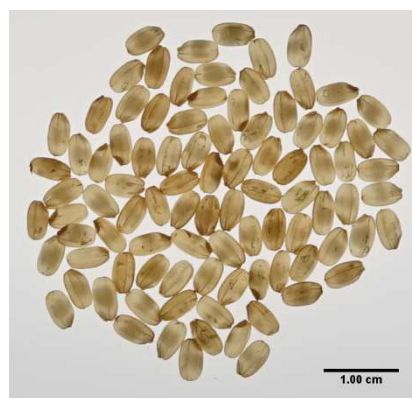

2013 Yamadanishiki

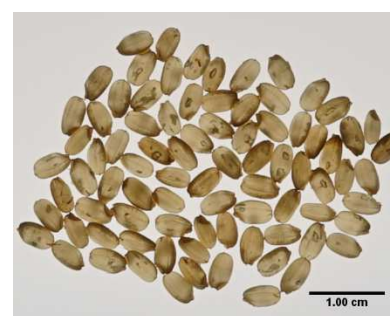

2013 VL\_E

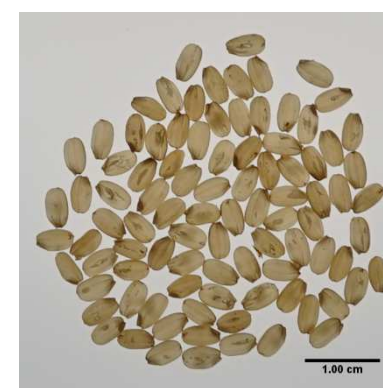

2013 VL\_L

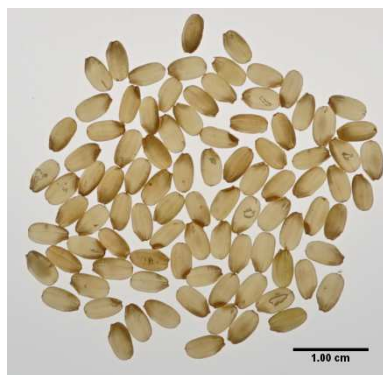

2014 Koshihikari

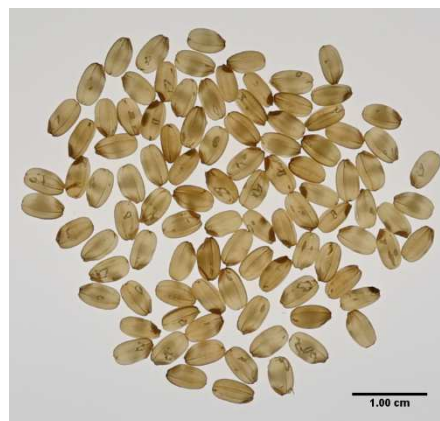

2014 Yamadanishiki

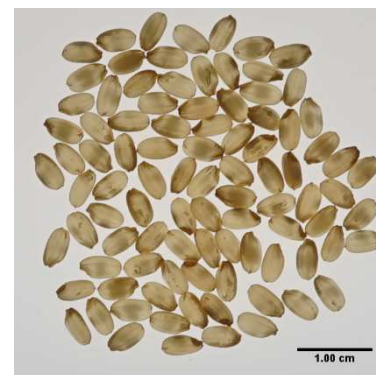

2014 VL\_E

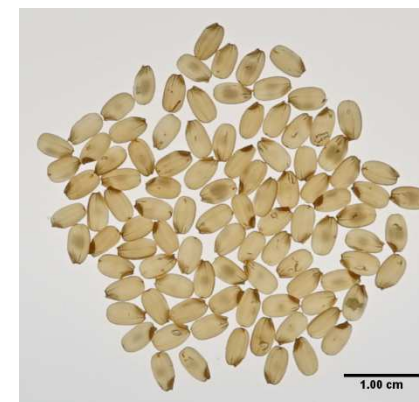

2014 VL\_L

Supplemental Fig. 3. Grain images of lines and parents used in the validation of *qWCE6*
