# Supplementary material for: Validation of a quantitative trait locus for the white-core expression rate of grain on chromosome 6 in a brewing rice cultivar and development of DNA markers for marker-assisted selection
Source: PubMed Central journal article supplement — Breed Sci. 2019 Jul 6;69(3):401–9. doi: 10.1270/jsbbs.18166 (PMC6776145; doi:10.1270/jsbbs.18166), 2019-07-06
Supplement: 69_18166_2.pdf [file 69_18166_2.pdf]

Supplemental Table 1 Markers used in the genotyping of BC<sub>2</sub>F<sub>4</sub> generation

| chr. | Marker Name           | Forward                        | Reverse                        |
|------|-----------------------|--------------------------------|--------------------------------|
| 1    | RM8068                | AAACCTCTCGCTGTAATTAG           | TGAACATTTATTGATATGGTAAA        |
| 1    | RM6451                | TATGACATTGACCGTGGGC            | TCTCCCCATGTTTGATCCTC           |
| 1    | RM6740                | GATGGGATAGACAAGCGCAC           | CCATCTAGGAGTACTAGTCTTCGC       |
| 1    | RM8003                | ATCATGTTAATTAATGTCTAGAA        | TGCTAAAAGGTTATTTTTAC           |
| 1    | RM5638                | CTGAGCAGCATTCCAGTCTG           | TCTTGCAGAAGTTCACGTA CTG        |
| 1    | RM3475                | GTTTGCCTAGTTGAGCTGACAG         | TTGGATGCACACTAGTCACAAC         |
| 1    | RM7202                | AACGTGGAGGCTCCTTTTTTC          | TTGCTATTAGTTGGTGGGGC           |
| 1    | RM246                 | GAGCTCCATCAGCCATT CAG          | CTGAGTGCTGCTGCGACT             |
| 1    | RM8085                | TGCGTTTTCGATTTCTTTTTA          | GGAAAGTTGTGTTCTTTGGC           |
| 1    | RM5448                | GGGGCCCTTAGAGTTTTTAC           | CTGCTACAGGACAAAACCAG           |
| 1    | RM1339                | ATCAAAGCATGTAAACCAGC           | CGTAAGATCTCCCTACCACC           |
| 1    | RM3482                | TTGTTGTCAAGCTACGGTGG           | CTGCTTCGTGATGTTGTTGG           |
| 1    | RM3523                | TCGATCGCTCGCTCTCTC             | GGATATGGAGCGCAAGAGAG           |
| 1    | RM8136                | ATGTAAGCTAGGTAGAGCTG           | GCGTACGTACGTAAGTAATA           |
| 2    | RM5345                | CAGATACCTCGCAAAAAGG            | CGGACCCCAAAGAAAAGAAAG          |
| 2    | RM1313                | TGTGTCTGAAAACCAAGGGG           | CGTCCAAGCTGTTTCGTTCTC          |
| 2    | RM3762                | GACGGGTCAGCTACCGTAAG           | TCCCCCTCTAAAACCCTAG            |
| 2    | RM5651                | AAGAGAACATTTGGAATCCT           | TAACCTGTGCCTTGTTTG             |
| 2    | RM5470                | TTCTAGTAGCTGGACAGTGG           | ATAAATCTCTTTGCCTTGGT           |
| 2    | RM1342                | AGAAACCAAAGATGGGAGGG           | CTAGCCAGCTCTCCCTTTTG           |
| 2    | RM530                 | GCACTGACCACGACTGTTTG           | ACCGTAACCCGGATCTATCC           |
| 2    | RM5472                | CACTCAAGACCAGACCTGTACG         | CGGCACGTCATTGTAGTGAC           |
| 2    | RM3542                | CTCCATGGAAAGCTAGCCAG           | AATCACCTTTTCAGTGCCTC           |
| 3    | RM3864                | AGTCAACCTTGGGGGTAAGG           | AGATACTGCCCGTGTCTATCC          |
| 3    | RM3029                | CGGTATAAACGTAAATATTC           | GGAGGTA CTTTTAAGCTAGT          |
| 3    | RM3766                | TTATAGAGCCAACACAACGG           | ATCGATCTCTCTCCTGGAAA           |
| 3    | RM3461                | AAAGTCTCCCTGTTGTAGCC           | CATGAACGTAAAGCAAACG            |
| 3    | RM1338                | AGAGGGAATTAGATTGGATT           | GGTCCACTTCTTCTTCTAT            |
| 3    | RM218                 | TGGTCAAACCAAGGTCCTTC           | GACATACATTCTACCCCCGG           |
| 3    | RM3513                | TACTCCTATCCTGCCATGGC           | TGTAGTAGACGAGAGGCCGG           |
| 3    | RM6329                | GTGCATTTCTCTTTTAATAG           | AACGACACATTAGTAGATGA           |
| 3    | Hd6_FNP <sup>a</sup>  | ACCTGGCAGCATGTTATGAC           | CTACAGATCCACAGAACAGG           |
| 3    | RM1038                | TGGTTCGATTTCGATTTC             | AAGCTATTACAAGCAGCTC            |
| 3    | Hd16_FNP <sup>b</sup> | CGACATTTTACAGGGGAACAATTAGATCCG | TACGACCTAAGTGGGCATGGACGCTCGT   |
|      |                       | TGGAAAGAAGCATCATCTGGT CAGCATG  | ACCTGATACCCTTGCCAAGGTAATCTCCCT |
| 3    | RM2187                | GTCATTTGAAGTAAATCCGT           | GGTCTACTTGCGAAATAAGT           |
| 4    | d4a0559 <sup>c</sup>  | AAACCTAACCTAGGCCCTGGATTACGGGCG | CATTCTTTCAGTTACCTTCAGAAGAGCAGC |
| 4    | 4a0516 <sup>a</sup>   | GCCTATGGTCTAGTAGCCACC          | CCGTGAAGCTGAGATCATGGT          |
| 4    | RM1359                | CAAAGGTCAACGAATTCTA            | CGGCTGGTTAATTAATCAAA           |
| 4    | RM3524                | CGGAGCTGGTCTAGCCATC            | GTCTCCGTCTTCTCCTACTCG          |
| 4    | RM3866                | AGTTGGTCATCTACCAGAGC           | GATCTTCTGCCTCAGAAAG            |
| 4    | RM1388                | TTCAATGAGGCAAAGGTAAG           | ATTGTAGCTTGGACTAGGGG           |
| 4    | RM5503                | GGGAAGAAGATAGGAGATGG           | CTCTGGGTACACTTCACGAG           |
| 4    | RM5473                | ACACGGAGATAAGACACGAG           | CGAGATTAACGTCGTCCTC            |
| 4    | RM5709                | CTGAATTTATTATAGGACGGAAG        | CATAGTATTGGATTGGACACG          |
| 4    | RM349                 | TTGCCATTCGCGTGGAGGCG           | GTCCATCATCCCTATGGTTCG          |
| 4    | RM2275                | ACTACTTAGGCATATTTGAA           | AACACTAATACGTCGATACA           |
| 4    | RM3648                | TACCCTTTCTTCCCCAAACC           | ACCTCCTCCTCCACTTCTCC           |
| 4    | RM1272                | TCTATGGATCTGCATGCTGG           | CTGCCCTGTCCTTTTAATCG           |
| 5    | RM1248                | ACAAGCAGCTAATGGTTGGG           | GTGATTTTGGCTCAGGTCAG           |
| 5    | RM3529                | CGCGCCACCTCGATATATAC           | GCTCAGGTTAACCAAGGTGG           |
| 5    | RM8039                | CGTACGTACTTATATCTCAT           | AAATCTAATGTATCTGAGGT           |
| 5    | RM430                 | AAACAACGACGTCCCTGATC           | GTGCCTCCGTGGTTATGAAC           |
| 5    | RM164                 | TCTTGCCCGTCACTGCAGATATCC       | GCAGCCCTAATGCTACAATTCTTC       |
| 5    | RM5592                | GTAACGCTTATTAACGATAA           | ATATTCTAGAACGAGGGTAG           |
| 5    | RM3476                | GATTCTCGTCGTAATCAAGA           | ATCCACGGTTAAGATAAATG           |
| 6    | RM1369                | CAATTGGCCCAAGGTCTGT            | GCGGATTCAAGATCATGTTGGT         |

|    |                       |                                |                          |
|----|-----------------------|--------------------------------|--------------------------|
| 6  | Hd17_FNP <sup>c</sup> | ATGGCTTGTCCCTGTCACCACTCCTT     | CCCATATGTTGGGCTGATG      |
| 6  | RM2615                | CAGAGTGCTTTAGACAATCA           | AAATTGGTAAGAGATTCTGC     |
| 6  | RM276                 | CTCAACGTTGACACCTCGTG           | TCTCCATCGAGCAGTATCA      |
| 6  | RM5585                | TCAGAGGTGGCAGCTTATTTTATACC     | ATGTAAATGGTCACACACACACAC |
| 6  | RM2523                | CCGTAGGTCTTCAAGTGATA           | GCAAAACCGAACTAAAATTA     |
| 6  | RM1340                | TCCAAACTAGTGGGAACGC            | CTCAACGCCATGAACCTC       |
| 6  | RM1370                | AAACGAGAACCAACCGACAC           | GGAGGGAGGAATGGGTACAC     |
| 7  | RM8010                | GAGCCACTGCTATATAAAGC           | ACCAAAATCCAAACTTTGTA     |
| 7  | RM6872                | GGATGAACACTGATGATGGC           | ACCTCCACCACGATATCCAC     |
| 7  | RM8006                | TGCCGGTTCTTAATTTTATC           | AATGGTCCACATTACTCCAC     |
| 7  | RM8036                | AGCAGAGCAATTTAACTAAG           | GCCTATCATAATATCCATCA     |
| 7  | RM320                 | CAACGTGATCGAGGATAGATC          | GGATTTGCTTACCACAGCTC     |
| 7  | RM1279                | GGGTATAAAATGCGTGGCAC           | ATGGATGGTACGAGGACGAG     |
| 7  | RM1364                | AAGAAATTCAAAACACATGA           | AAAACATCTACTTTGATCCA     |
| 7  | RM5720                | CCTGATAAATTGACAGTTAC           | GAGAGTAGGAGTTGATAACA     |
| 7  | RM1306                | TGCCAATTACCTTCCCCTAC           | TGCTCCGTATTGCTGCTATG     |
| 8  | RM3819                | ACCTCACCTGTGGATCTTGG           | CAATCCCCTTCTCTCCTTCC     |
| 8  | RM5556                | ATCTCCCTCCCTCTCCTCAC           | TCCACACCTTCACAGTTGAC     |
| 8  | RM3374                | ATGAACTAGTGAACCCCCC            | GTAGCGGTAGCTGCAAAAGC     |
| 8  | RM2910                | CAGCTGCTCATATTCATATA           | ATAAGGTACTIONCATCCGTTA   |
| 8  | RM7049                | AACCTAGATCTAATCCGTGG           | CATCTCTGAGTTGAGCAAAAC    |
| 8  | RM5485                | CTTCCACAAGCTTGGCTAGG           | AATGCCATCCCCTACTCATG     |
| 8  | RM80                  | TTGAAGGCGCTGAAGGAG             | CATCAACCTCGTCTTCACCG     |
| 8  | RM281                 | ACCAAGCATCCAGTGACCAG           | GTTCTTCATACAGTCCACATG    |
| 8  | RM3155                | AATCCACATTTGGCTTCTC            | CGTGTAACCTGTTTCGCTTG     |
| 9  | RM2855                | GGAGCTTAGAATCTCACCTA           | CGCATTTTCTTATACATACA     |
| 9  | RM257                 | CAGTTCCGAGCAAGAGTACTC          | GGATCGGACGTGGCATATG      |
| 9  | RM160                 | AGCTAGCAGCTATAGCTTAGCTGGAGATCG | TCTCATCGCCATGCGAGGCCTC   |
| 9  | RM215                 | CAAAATGGAGCAGCAAGAGC           | TGAGCACCTCCTTCTCTGTAG    |
| 9  | RM2144                | ACATTATGAAACGGAGGAAG           | GAAATGATGCATCAGCATT      |
| 10 | RM5271                | CGGTGTAGATTGTAGGTACA           | GTAGTTTAGTTATTGCGCAC     |
| 10 | RM4455                | CTCTCAAAGAACTAGGACTC           | GAGAAGGTATGATAACCAAT     |
| 10 | RM1083                | CCTTGATTGCAGCATCCG             | TTGAGCCTTTTACGAGACGG     |
| 10 | RM6704                | AATCGAATCTGGATATCTTG           | CTTCTACCTAGTACCGAGA      |
| 10 | RM4477                | AGTAAACATGTCTTCGGGAT           | CAGTGCATATTCCTACTGGTA    |
| 10 | RM5352                | GGAACATAACATGGTGCAAG           | ACCAGATCACATGAAGAGGA     |
| 11 | RM1761                | ACGCTTAAAGAACATTTGAT           | GCGATTAACCTTTTAAACCATT   |
| 11 | RM5704                | AACGAATGATTAAACATCTA           | AAGCAGAGTCAACATATTTA     |
| 11 | RM6894                | AATCTCCACTGCAGCGATTC           | CGAATGGTCAAACGTAGGTG     |
| 11 | RM3625                | CTTGCAATTCAATTGCTTAC           | GGTGGCCTAGTGAAACTAAA     |
| 11 | RM1341                | AACCTGGAGGTGCTGGTCTC           | TTTCTCCCCCACCAC          |
| 11 | RM4844                | TACATTCTCAAATGTAGCTG           | AGTCCACAGTACTGTTTCATC    |
| 12 | RM1880                | ACCACTAAATAAGCACATAC           | GGCATCATACATTAATAATAC    |
| 12 | RM3747                | AGCAATGCACTCCCTTGATC           | TGCTTCCTCCTTGGTTTGG      |
| 12 | RM3455                | TGAATCCACACTCGCAGATC           | GCCAGTCCACGATTGGTC       |
| 12 | RM2529                | CATTAAAATCAGTGGGACTG           | AGGCATTTCTGATATGATC      |
| 12 | RM101                 | GTGAATGGTCAAGTGACTIONTAGGTGGC  | ACACAACATGTTCCCTCCCATGC  |
| 12 | RM2972                | GAGCCAATATGTTGTCTTGA           | GTTCAGATCATGATGCCTAC     |
| 12 | RM1986                | TAACGGAGGGAGTAGTTTTTC          | GAACCTACATATCGAGAGCA     |
| 12 | RM2197                | ACTGAGAACTTTAATCATCG           | GAACAACCTTTGAAGAGAAAC    |

<sup>a</sup> CAPS markars.

<sup>b</sup> PCR-CTPP marker.

<sup>c</sup> dCAPS markars.

These markars (a, b and c) were reacted according to Okada et al. (2017) and Okada et al. (2018a).

Supplemental Table 2 Information of insertion/deletion (INDEL) between Koshihikari and Yamdanishiki searched by rice TASUKE

| Position on chr.6 (bp) | Type <sup>b</sup> | Ref <sup>c</sup>                   | Alt <sup>d</sup>                                                          |
|------------------------|-------------------|------------------------------------|---------------------------------------------------------------------------|
| 2,002,736              | DEL               | AGCAAACACAACAGGGCG                 | A                                                                         |
| 2,022,644              | DEL               | CGCGCGGCCGCTTCTCTCCTCTCCGGCCGACGCC | G                                                                         |
| 2,042,217              | DEL               | TTGTAGTAATATAAACT                  | C                                                                         |
| 2,112,828              | DEL               | AGGCCACAGAGAT                      | G                                                                         |
| 2,118,185              | DEL               | GGCCTCCTC                          | A                                                                         |
| 2119081                | INS               | T                                  | TGCATTTTCAGG                                                              |
| 2,214,400              | INS               | A                                  | ACTTTAAGTAATCCATAGT                                                       |
| 2,292,886              | INS               | C                                  | CTTCTT                                                                    |
| 2,376,346              | INS               | t                                  | CAAGCCAGCAGTCTAGCACACAAGTCACAAAGCAATTTAAACGCTGCCTCACAAAGCCAAGCCAGCAGTCTAA |
| 3,468,189              | INS               | c                                  | TGGAAAAT                                                                  |
| 3,475,155              | INS               | T                                  | TGCATTACTGGGAAAGAAAA                                                      |
| 3483458                | DEL               | CTCCGCAGCCGTTGT                    | C                                                                         |
| 3,632,612              | DEL               | AGCTGTTTAAAA                       | A                                                                         |
| 3,652,851              | INS               | c                                  | CACGAAACATATCTCGCATCCCT                                                   |
| 3,652,857              | INS               | a                                  | CCAGATATCTCGCGTCCCTTAATTAATTAACCGGTC                                      |

<sup>a</sup> IRGSP1.0 position.

<sup>b</sup> INS or DEL indicated insertion or deletion from Koshihikari to Yamadanishiki.

<sup>c</sup> Koshihikari allele.

<sup>d</sup> Yamadanishiki allele.

Their INDEL were searched by conditions that we compared Koshihikari (ID: SAMD00045947) and Yamadanishiki (ID: SAMD00010633) and INDEL site were depth > 5 using rice TASUKE (Kumagai et al. 2013, <https://ricegenomes.dna.affrc.go.jp/>).

Supplemental Table 3 Chalky grain rate out of WCE for validation lines and parents

|               | White-belly grain rate (%) |        | White-back grain rate (%) |        | Basal-white grain rate (%) |        | Milky-white grain rate (%) |        |
|---------------|----------------------------|--------|---------------------------|--------|----------------------------|--------|----------------------------|--------|
|               | 2013                       | 2014   | 2013                      | 2014   | 2013                       | 2014   | 2013                       | 2014   |
| VL_E          | 28 ± 11                    | 20 ± 8 | 49 ± 23                   | 15 ± 7 | 9 ± 3                      | 3 ± 1  | 11 ± 6                     | 13 ± 3 |
| VL_L          | 3 ± 1                      | 3 ± 1  | 0 ± 0                     | 0 ± 0  | 0 ± 0                      | 0 ± 0  | 1 ± 1                      | 0 ± 0  |
| Koshihikari   | 11 ± 4                     | 1 ± 1  | 29 ± 10                   | 24 ± 9 | 6 ± 2                      | 16 ± 9 | 16 ± 6                     | 10 ± 5 |
| Yamadanishiki | 9 ± 1                      | 9 ± 2  | 0 ± 0                     | 0 ± 0  | 0 ± 0                      | 0 ± 0  | 1 ± 1                      | 0 ± 0  |
